# Supplementary material for: Comparison of prevalence of Felis catus papillomavirus type 2 in squamous cell carcinomas in cats between Taiwan and Japan
Source: PubMed Central journal article supplement — J Vet Med Sci. 2021 Jun 15;83(8):1229–33. doi: 10.1292/jvms.21-0153 (PMC8437716; doi:10.1292/jvms.21-0153), 2021-06-15
Supplement: jvms-83-1229-s001.pdf [file jvms-83-1229-s001.pdf]

# Supplementary Fig. 1

### Age (Taiwan)

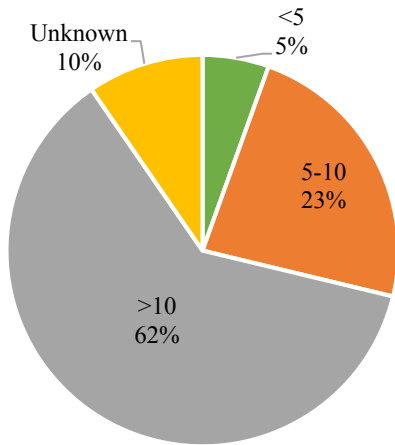

### Age (Japan)

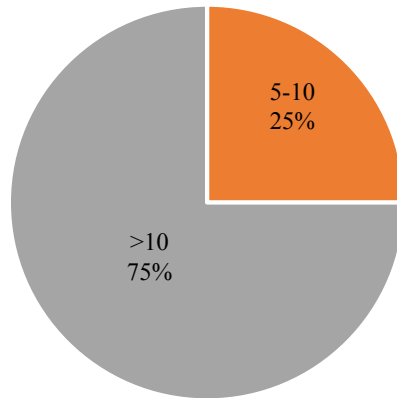

### Age (Taiwan and Japan)

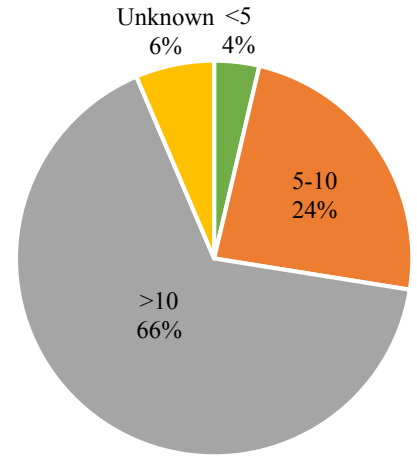

### Sex (Taiwan)

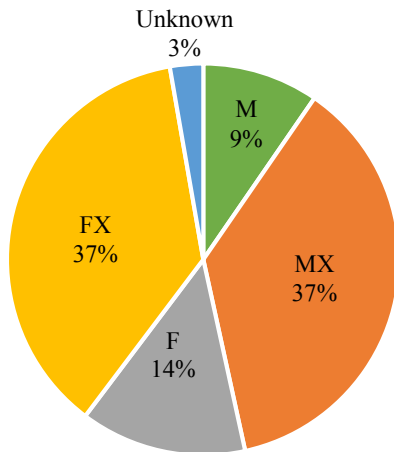

### Sex (Japan)

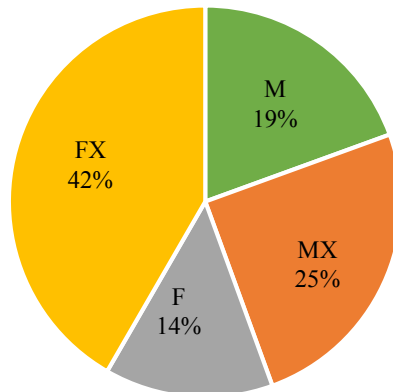

### Sex (Taiwan and Japan)

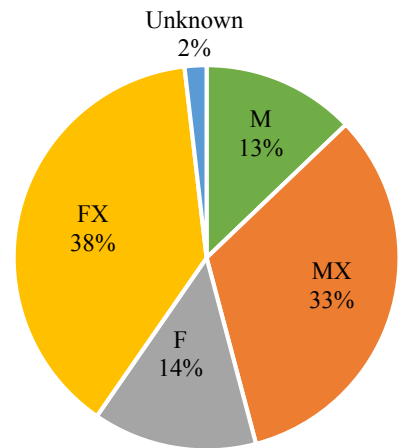

### Lesion site (Taiwan)

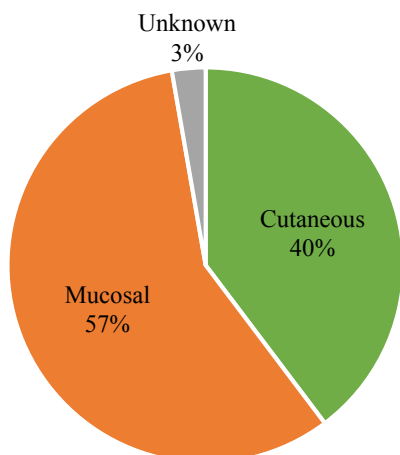

### Lesion site (Japan)

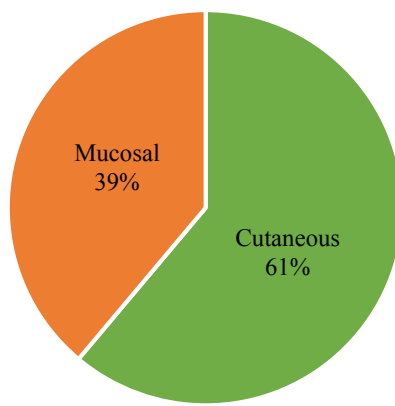

### Lesion site (Taiwan and Japan)

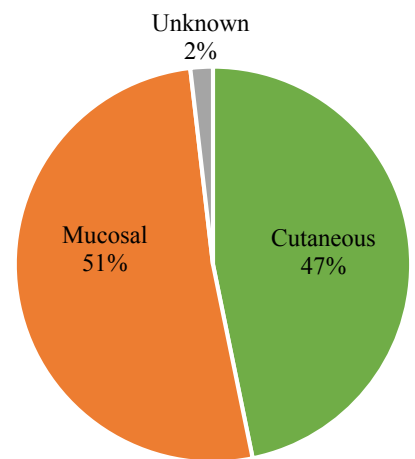

Supplementary Table 1 Sample information and PCR results of each case collected in Taiwan and Japan

| Sample ID     | Year collected | Breed              | Age (years) | Sex     | Lesion site                                                                                   | Mucosal/Cutaneous | ACTB PCR | FcaPV2 E1 PCR | FcaPV2 E7 PCR |
|---------------|----------------|--------------------|-------------|---------|-----------------------------------------------------------------------------------------------|-------------------|----------|---------------|---------------|
| <b>Taiwan</b> |                |                    |             |         |                                                                                               |                   |          |               |               |
| SF1           | 2017           | Domestic shorthair | 12          | FX      | Ear canal (left)                                                                              | Mucosal           | -        | +             | -             |
| SF2           | 2017           | Chinchilla         | 13          | F       | Flank (right abdomen/inguina)                                                                 | Cutaneous         | +        | -             | -             |
| SF3           | 2017           | Chinchilla         | 12          | FX      | Ear (left) and salivary gland                                                                 | Cutaneous         | +        | +             | +             |
| SF4           | 2017           | Chinchilla         | 16          | FX      | Oral cavity                                                                                   | Mucosal (Oral)    | +        | -             | -             |
| SF5           | 2017           | Mixed              | 12          | MX      | Face (right, near the medial canthus)                                                         | Cutaneous         | -        | +             | +             |
| SF6           | 2017           | American shorthair | 10          | MX      | Lower jaw (right)                                                                             | Cutaneous         | +        | -             | -             |
| SF7           | 2017           | Mixed              | 12          | FX      | Upper jaw                                                                                     | Cutaneous         | -        | -             | -             |
| SF8           | 2017           | Domestic shorthair | 15          | MX      | Mandibular bone                                                                               | Cutaneous         | +        | +             | +             |
| SF9           | 2017           | Scottish fold      | 15          | FX      | Tongue                                                                                        | Mucosal (Oral)    | +        | +             | +             |
| SF10          | 2017           | Persian            | 14          | MX      | Jaw                                                                                           | Cutaneous         | +        | -             | -             |
| SF11          | 2017           | American shorthair | 11          | M       | Lower jaw (with regional invasion in the mandibular bone)                                     | Cutaneous         | +        | -             | -             |
| SF12          | 2017           | Mixed              | 3           | F       | Ear and eye (right)                                                                           | Cutaneous         | +        | -             | -             |
| SF13          | 2017           | Chinchilla         | 14          | MX      | Tongue                                                                                        | Mucosal (Oral)    | +        | -             | +             |
| SF14          | 2017           | Mixed              | 10          | F       | Optic disc                                                                                    | Mucosal           | -        | -             | -             |
| SF15          | 2017           | Persian            | 14          | FX      | Eyeball and part of the eyelid (right)                                                        | Mucosal           | +        | -             | -             |
| SF16          | 2017           | American shorthair | 11          | MX      | Lower jaw (with regional submandibular bone invasion)                                         | Cutaneous         | +        | -             | -             |
| SF17          | 2017           | Chinchilla         | Unknown     | MX      | Tongue                                                                                        | Mucosal (Oral)    | -        | +             | -             |
| SF18          | 2017           | Mixed              | Unknown     | F       | Oral cavity                                                                                   | Mucosal (Oral)    | +        | +             | -             |
| SF19          | 2017           | Domestic shorthair | 11          | FX      | Lower jaw (right)                                                                             | Cutaneous         | +        | +             | -             |
| SF20          | 2017           | Mixed              | 11          | MX      | Oral cavity                                                                                   | Mucosal (Oral)    | +        | -             | -             |
| SF21          | 2017           | Persian            | 16          | FX      | Lower jaw                                                                                     | Cutaneous         | +        | +             | +             |
| SF22          | 2017           | Mixed              | 9           | FX      | Nasal cavity                                                                                  | Mucosal           | +        | -             | -             |
| SF23          | 2017           | Mixed              | 11          | M       | Tongue                                                                                        | Mucosal (Oral)    | -        | -             | -             |
| SF24          | 2017           | Domestic longhair  | 15          | MX      | Oral cavity                                                                                   | Mucosal (Oral)    | +        | -             | -             |
| SF25          | 2017           | Mixed              | 10          | FX      | Ear pinnae (right and left)                                                                   | Cutaneous         | -        | +             | -             |
| SF26          | 2017           | Mixed              | 10          | FX      | Face                                                                                          | Cutaneous         | +        | -             | -             |
| SF27          | 2017           | American shorthair | 11          | MX      | Upper jaw                                                                                     | Cutaneous         | +        | -             | -             |
| SF28          | 2016           | Mixed              | 13          | FX      | Tongue                                                                                        | Mucosal (Oral)    | +        | +             | -             |
| SF29          | 2016           | Chinchilla         | 13          | MX      | Tongue                                                                                        | Mucosal (Oral)    | +        | -             | -             |
| SF30          | 2016           | Mixed              | 16          | MX      | Tongue                                                                                        | Mucosal (Oral)    | +        | -             | +             |
| SF31          | 2016           | Mixed              | 4.5         | F       | Frontal sinus                                                                                 | Mucosal           | +        | +             | +             |
| SF32          | 2016           | Persian            | 6           | F       | Oral cavity (gingiva and alveolar bone)                                                       | Mucosal (Oral)    | +        | +             | +             |
| SF33          | 2016           | Scottish fold      | Unknown     | MX      | Abdomen                                                                                       | Cutaneous         | +        | -             | +             |
| SF35          | 2016           | Chinchilla         | 14          | MX      | Oral cavity (tongue and soft palate)                                                          | Mucosal (Oral)    | +        | -             | -             |
| SF36          | 2016           | Mixed              | 14          | M       | Oral cavity (with desmoplasia)                                                                | Mucosal (Oral)    | -        | +             | +             |
| SF37          | 2016           | Mixed              | 13          | FX      | Tongue                                                                                        | Mucosal (Oral)    | -        | +             | +             |
| SF38          | 2016           | Mixed              | 16          | FX      | Oral cavity (left side, upper gingiva and palatine)                                           | Mucosal (Oral)    | +        | -             | +             |
| SF39          | 2016           | Domestic shorthair | 13          | FX      | Lower jaw (with invasion to woven bone and skeletal muscle)                                   | Cutaneous         | -        | +             | -             |
| SF40          | 2016           | Chinchilla         | 15          | FX      | Face and nasal cavity (left side)                                                             | Mucosal           | -        | -             | -             |
| SF41          | 2016           | Persian            | 14          | MX      | Pharynx (right side)                                                                          | Mucosal           | +        | -             | +             |
| SF42          | 2016           | Domestic shorthair | 8           | FX      | Tongue (with glossitis)                                                                       | Mucosal (Oral)    | -        | -             | -             |
| SF43          | 2016           | Domestic shorthair | 17          | FX      | Tongue                                                                                        | Mucosal (Oral)    | +        | -             | +             |
| SF44          | 2016           | Domestic shorthair | Unknown     | FX      | Lip (right side, with stromal and muscular invasion)                                          | Cutaneous         | -        | -             | -             |
| SF45          | 2016           | Domestic shorthair | Unknown     | FX      | Lower jaw (right side)                                                                        | Cutaneous         | -        | +             | -             |
| SF46          | 2016           | Persian Mix        | 15          | M       | Tongue (with lymphovascular invasion)                                                         | Mucosal (Oral)    | +        | -             | +             |
| SF47          | 2016           | Mixed              | 4           | MX      | Oral cavity                                                                                   | Mucosal (Oral)    | -        | -             | -             |
| SF48          | 2016           | Mixed              | 13          | F       | Oral cavity and upper lip (buccal mucosa and upper lip, with stromal and bone/tooth invasion) | Mucosal (Oral)    | -        | -             | -             |
| SF49          | 2016           | Domestic shorthair | 9           | MX      | Esophagus                                                                                     | Mucosal           | +        | +             | -             |
| SF50          | 2016           | Mixed              | 12          | FX      | Oral cavity (with chronic active gingivitis)                                                  | Mucosal (Oral)    | -        | +             | -             |
| SF51          | 2016           | Mixed              | 10          | FX      | Tongue and adjacent gingiva (with lymphovascular invasion)                                    | Mucosal (Oral)    | +        | -             | -             |
| SF52          | 2016           | Domestic shorthair | >6          | MX      | Oral cavity and lymphnode of the face                                                         | Mucosal (Oral)    | +        | +             | +             |
| SF53          | 2016           | Domestic shorthair | 5           | MX      | Lower jaw (left side, with invasion to the submandibular salivary gland)                      | Cutaneous         | +        | -             | -             |
| SF54          | 2016           | Mixed              | 18          | MX      | Lower jaw (cranial mandible)                                                                  | Cutaneous         | -        | -             | -             |
| SF55          | 2016           | Chinchilla         | 16          | MX      | Skin (back)                                                                                   | Cutaneous         | +        | +             | +             |
| SF57          | 2016           | Mixed              | 10          | Unknown | Ear canal (basosquamous cell carcinoma)                                                       | Mucosal           | +        | +             | +             |
| SF58          | 2016           | Mixed              | Unknown     | MX      | Resected ear (right) (basosquamous cell carcinoma)                                            | Cutaneous         | +        | -             | -             |
| SF60          | 2015           | Mixed              | 16          | MX      | First digit (left)                                                                            | Cutaneous         | -        | -             | -             |
| SF62          | 2015           | Mixed              | Unknown     | FX      | Oral cavity (palate, left side)                                                               | Mucosal (Oral)    | -        | -             | -             |
| SF63          | 2015           | Persian            | 16          | MX      | Urinary bladder                                                                               | Mucosal           | +        | -             | -             |
| SF66          | 2015           | Mixed              | 7.8         | MX      | Third digit (left, with lymphoplasmacytic dactylitis)                                         | Cutaneous         | +        | -             | -             |
| SF67          | 2015           | Mixed              | 14          | M       | Oral cavity (mandibular gingiva, with desmoplasia)                                            | Mucosal (Oral)    | +        | -             | -             |
| SF68          | 2015           | Mixed              | 12-13       | F       | Digit (right, with metastasis to digital bone)                                                | Cutaneous         | +        | -             | -             |
| SF69          | 2015           | Mixed              | 12          | FX      | Origin undetermined (small intestine, pancreas, liver, kidney, adipose tissues)               | Unknown           | -        | -             | -             |
| SF70          | 2015           | Mixed              | 6           | FX      | Chest                                                                                         | Cutaneous         | -        | -             | -             |
| SF73          | 2015           | Domestic shorthair | 0.5         | M       | Esophagus                                                                                     | Mucosal           | -        | -             | -             |
| SF74          | 2015           | Tabby              | 10          | FX      | Ear canal and tympanic bulla (left, with bone invasion)                                       | Mucosal           | +        | -             | -             |
| SF75          | 2015           | Persian            | 12          | MX      | Elbow (left, with stromal and muscular invasion)                                              | Cutaneous         | -        | -             | -             |
| SF76          | 2015           | Mixed              | 10          | FX      | Ear canal (with bone invasion and suppurative)                                                | Mucosal           | +        | -             | -             |
| SF77          | 2015           | Unknown            | 17          | MX      | Oral (gingivitis)                                                                             | Mucosal (Oral)    | +        | -             | -             |
| SF78          | 2015           | American shorthair | 13          | F       | Lower jaw                                                                                     | Cutaneous         | +        | -             | -             |
| SF79          | 2015           | Domestic shorthair | 14          | Unknown | Ear canal                                                                                     | Mucosal           | +        | +             | -             |
| SF80          | 2015           | Mixed              | 14          | F       | Oral cavity                                                                                   | Mucosal (Oral)    | +        | -             | -             |
| SF81          | 2015           | Mixed              | 8-9         | M       | Unknown                                                                                       | Unknown           | -        | -             | -             |
| <b>Japan</b>  |                |                    |             |         |                                                                                               |                   |          |               |               |
| 13-060        | 2013           | Mixed              | 13          | FX      | Skin                                                                                          | Cutaneous         | +        | -             | -             |
| 13-136        | 2013           | Mixed              | 14          | FX      | Skin                                                                                          | Cutaneous         | +        | -             | -             |
| 13-0071       | 2013           | Mixed              | 14          | F       | Lower jaw                                                                                     | Cutaneous         | +        | -             | -             |
| 13-182        | 2013           | Mixed              | 13          | M       | Upper jaw                                                                                     | Cutaneous         | +        | -             | -             |
| 13-0055       | 2013           | Mixed              | 14          | F       | Lower jaw                                                                                     | Cutaneous         | +        | -             | -             |
| 13-0107       | 2013           | Mixed              | 12          | FX      | Oral cavity (submandible lymph node)                                                          | Mucosal (Oral)    | +        | -             | -             |
| 13-0153       | 2013           | Mixed              | 12          | MX      | Skin (left, eyelid)                                                                           | Cutaneous         | +        | -             | -             |
| 13-0193       | 2013           | Abysinnian         | 12          | F       | Lower jaw (right side)                                                                        | Cutaneous         | -        | -             | -             |
| 13-0272       | 2013           | American shorthair | 15          | F       | Skin (right, hindlimb, 3rd digit)                                                             | Cutaneous         | +        | -             | -             |
| 13-0297       | 2013           | Mixed              | 12          | MX      | Oral cavity (right side, lower giniva)                                                        | Mucosal (Oral)    | +        | -             | -             |
| 13-848        | 2013           | Mixed              | 8           | FX      | Auditory canal (left)                                                                         | Mucosal           | +        | -             | -             |
| 13-882        | 2013           | Mixed              | 16          | FX      | Tongue                                                                                        | Mucosal (Oral)    | +        | +             | +             |
| 13-944        | 2013           | Scottish fold      | 10          | MX      | Tongue                                                                                        | Mucosal (Oral)    | +        | -             | -             |
| 5741-2013     | 2013           | Mixed              | 12          | MX      | Anus                                                                                          | Mucosal           | +        | -             | -             |
| 14-240        | 2014           | American shorthair | 11          | M       | Lower jaw                                                                                     | Cutaneous         | +        | -             | -             |
| 14-1110       | 2014           | American shorthair | 10          | MX      | Skin (right, forelimb, digit)                                                                 | Cutaneous         | +        | -             | -             |
| 14-788        | 2014           | Mixed              | 13          | M       | Skin (right side, upper jaw)                                                                  | Cutaneous         | +        | -             | -             |
| 14-1018       | 2014           | Mixed              | 16          | FX      | Auditory canal (left)                                                                         | Mucosal           | +        | -             | -             |
| 6997-2015     | 2015           | Mixed              | 9           | M       | Oral cavity (buccal mucosa)                                                                   | Mucosal (Oral)    | +        | -             | -             |
| 15-577        | 2015           | Mixed              | 15          | FX      | Oral cavity (upper gingiva, right side)                                                       | Mucosal (Oral)    | +        | -             | -             |
| 15-637        | 2015           | Mixed              | 11          | FX      | Lower jaw                                                                                     | Cutaneous         | +        | -             | -             |
| 15-615        | 2015           | Mixed              | 10          | MX      | Esophagus                                                                                     | Mucosal           | +        | -             | -             |
| 15-358        | 2015           | Mixed              | 13          | FX      | Skin (left, auditory canal)                                                                   | Cutaneous         | +        | -             | -             |
| 15-291        | 2015           | Mixed              | 10          | FX      | Oral cavity (upper gingiva)                                                                   | Mucosal (Oral)    | +        | -             | -             |
| 15-498        | 2015           | Mixed              | 9           | MX      | Skin (left, external ear)                                                                     | Cutaneous         | +        | -             | -             |
| 15-528        | 2015           | Mixed              | 16          | MX      | Tongue (right, sublingual)                                                                    | Mucosal (Oral)    | +        | -             | -             |
| 15-0836       | 2015           | Mixed              | 14          | M       | Nasal cavity                                                                                  | Mucosal           | +        | -             | -             |
| 15-0871       | 2015           | Mixed              | 12          | FX      | Lower jaw (left side)                                                                         | Cutaneous         | +        | -             | -             |
| 16-0480       | 2016           | Mixed              | 11          | MX      | Lower jaw (left side)                                                                         | Cutaneous         | +        | -             | -             |
| 16-0593       | 2016           | Mixed              | 15          | FX      | Lower jaw (left side)                                                                         | Cutaneous         | +        | +             | -             |
| 16-0780       | 2016           | Mixed              | 10          | FX      | Oral cavity (lower gingiva, right side)                                                       | Mucosal (Oral)    | +        | -             | -             |
| 16-0781       | 2016           | Mixed              | 15          | FX      | Lower jaw                                                                                     | Cutaneous         | +        | -             | -             |
| 16-0113       | 2016           | Mixed              | 11          | F       | Lower jaw                                                                                     | Cutaneous         | +        | -             | -             |
| 17-0197       | 2017           | Maine coon         | 13          | FX      | Lower jaw (right side)                                                                        | Cutaneous         | +        | -             | -             |
| 5757          | Unknown        | Mixed              | 8           | M       | Skin (right side, face)                                                                       | Cutaneous         | +        | +             | +             |
| 5693          | Unknown        | Mixed              | 11          | M       | Lip                                                                                           | Cutaneous         | +        | -             | -             |

Sample ID, breed, age, sex, lesion site, and PCR results of each squamous cell carcinoma (SCC) case collected in Taiwan and Japan is shown.
